# Supplementary material for: A facile precursor route towards the synthesis of Fe1−xS@NC-rGO composite anode materials for high-performance lithium-ion batteries
Source: Royal Society of Chemistry journal article supplement (doi:10.1039/d2dt03883h), 2022-12-30
Supplement: d2dt03883h1.pdf [file d2dt03883h1.pdf]

*Supporting Information*

A facile precursor route towards the synthesis of  
 $\text{Fe}_{1-x}\text{S}@NC\text{-rGO}$  composite anode materials for  
high-performance lithium-ion batteries

Guanghao Zhan<sup>a,b</sup>, Ruibo Yan<sup>b,c</sup>, Wenhua Liao<sup>b,c</sup>, Qianqian Hu<sup>\*b</sup>, Xiaoying Huang<sup>\*b</sup>

<sup>a</sup>College of Chemistry, Fuzhou University, Fuzhou, Fujian 350108, PR. China

<sup>b</sup> State Key Laboratory of Structural Chemistry, Fujian Institute of Research on the  
Structure of Matter, Chinese Academy of Sciences, Fuzhou 350002, PR China

<sup>c</sup> College of Chemistry and Materials Science, Fujian Normal University, Fuzhou,  
Fujian 350007, PR China

\*Corresponding author

E-mail: xyhuang@fjirsm.ac.cn (HuangXY); huqianqian@fjirsm.ac.cn (HuQQ)

# 1. Experimental

## 1.1. Preparation of Organic-Inorganic Composite

$\text{Fe}_{1-x}\text{S}(\text{en})_{0.5}$  nanowires were prepared by a facile solvothermal process. Typically, 1.5 mmol of  $\text{FeCl}_2 \cdot 4\text{H}_2\text{O}$  and 3 mmol of thioacetamide were mixed in a Teflon-lined stainless-steel autoclave with the capacity of 28 mL, and then 10 mL of ethylenediamine was added. After fully stirred, the autoclave was kept at 180 °C for 4 days. The brown needle flocs obtained from the autoclave were filtered and washed in methanol for three times, and the resulting product was dried in the vacuum at 70 °C for 12 h.

## 1.2. Preparation of $\text{Fe}_{1-x}\text{S}@\text{NC-rGO}$ Composites

45 mg of  $\text{Fe}_{1-x}\text{S}(\text{en})_{0.5}$  was encapsulated in a quartz tube (1 cm in diameter and 15 cm in length), which was then evacuated and sealed. The tube was heated to 700 °C with a heating rate of 2 °C  $\text{min}^{-1}$  in a muffle furnace and then held for 2 h. Before taking out of the product, the furnace was naturally drop to room temperature. Then, the black N-doped carbon-coated  $\text{Fe}_{1-x}\text{S}$  sheets ( $\text{Fe}_{1-x}\text{S}@\text{NC}$ ) were obtained.

$\text{Fe}_{1-x}\text{S}@\text{NC-rGO}$  composites were prepared by a simple stirring at room temperature and subsequent heat treatment. In the typical synthesis, 66.9 mg of  $\text{Fe}_{1-x}\text{S}@\text{NC}$  was added to 50 mL of rGO<sup>1</sup> ethanol solution with different concentration (0.0, 0.5, 1.0, 2.0 mg  $\text{mL}^{-1}$ ), and then continuously stirred for 1 h to form the assembly composites. The obtained suspension was centrifuged at 8000 rpm, and then the bottom sample was collected and dried in a vacuum oven at 60 °C for 12 h. The dried product was annealed at 350 °C for 2 h in the tube furnace under the mixed atmosphere of  $\text{H}_2$  and  $\text{N}_2$  (10%  $\text{H}_2$  in volume). The resulting composites obtained using the rGO solutions with concentrations of 0.0, 0.5, 1.0, 2.0 mg  $\text{mL}^{-1}$ , are denoted as  $\text{Fe}_{1-x}\text{S}@\text{NC}$ ,  $\text{Fe}_{1-x}\text{S}@\text{NC-rGO-1}$ ,  $\text{Fe}_{1-x}\text{S}@\text{NC-rGO-2}$ , and  $\text{Fe}_{1-x}\text{S}@\text{NC-rGO-3}$ , respectively.

## 1.3. Materials characterizations

The reagents used are commercially available products without further purification. The phase composition and content of the composites were analyzed using an X-ray powder diffractometer (PXRD Rigaku Xray Miniflex ii, Cu  $\text{K}\alpha$  radiation source,

$\lambda=1.5418 \text{ \AA}$ ) and an elemental analyzer (EA ELEMENTAR VARIO EL CUBE). The structural characteristics of the composites were measured by field emission scanning electron microscopy (FESEM SU8010) and transmission electron microscopy (TEM FEI Talos F200S). Raman spectra are analyzed on a Horiba Labram HR800 Evolution Raman spectrometer. Thermogravimetric spectra were obtained on a thermal analyzer (TGA NETZSCH STA449F3). The specific surface area (BET) was calculated by automatic static chemical adsorption instrument (ASAP 2020). X-ray photoelectron spectroscopy was measured on an X-ray photoelectron spectrometer (XPS ESCALAB 250Xi Al K $\alpha$   $\lambda=8 \text{ \AA}$ ,  $h\nu=1486.6 \text{ eV}$ ).

#### **1.4. Electrochemical measurements**

The composite material was assembled into a CR 2032 button battery for electrochemical performance testing. 70 wt% of active material, 20 wt% of conductive carbon black, 10 wt% of polyvinylidene fluoride (PVDF), and an appropriate amount of 1-N-methyl-2-pyrrolidone (NMP) were mixed, and the slurry was evenly coated on the copper foil as a working electrode. It is dried in a blast furnace at 80 °C for 6 h and then placed in a vacuum oven at 120 °C for 12 h. The dried copper foil was pressed into a 1.2 cm wafer on a 10 MPa tableting machine, and the mass of active material was about 1.0 mg cm<sup>-2</sup>. The storage performance of lithium was studied with the prepared materials. Lithium foil acted as reference electrode and Celgard 2325 acted as separator. The electrolyte is composed of 1.0 M LiPF<sub>6</sub> dissolved in ethylene carbonate/dimethyl carbonate/diethyl carbonate (volume ratio of 1 : 1 : 1) (containing 5 vol% vinyl fluoride carbonate). Electrochemical impedance spectroscopy (EIS) and cyclic voltammetry (CV) were performed on an electrochemical workstation (CHI660E). Constant current discharge/charge cycles and rate performance tests are performed on LAND 2001A software.

**Table. S1.** Elemental analysis (EA) results of Fe<sub>1-x</sub>S@NC and Fe<sub>1-x</sub>S@NC-rGO.

| material                     | N (wt %) | C (wt %) |
|------------------------------|----------|----------|
| Fe <sub>1-x</sub> S@NC       | 4.4      | 17.92    |
| Fe <sub>1-x</sub> S@NC-rGO-1 | 3.72     | 21.6     |
| Fe <sub>1-x</sub> S@NC-rGO-2 | 3.65     | 25.44    |
| Fe <sub>1-x</sub> S@NC-rGO-3 | 0.67     | 31.38    |

**Table. S2.** Comparison of high current cycling performance for Fe<sub>1-x</sub>S@NC-rGO-2 composite and previously reported iron sulfide-based materials.

| material                          | current density<br>(mA g <sup>-1</sup> ) | number of<br>cycles | Capacity<br>(mAh g <sup>-1</sup> ) | reference |
|-----------------------------------|------------------------------------------|---------------------|------------------------------------|-----------|
| FeS/PC                            | 0.1                                      | 65                  | 592                                | 2         |
| FeS <sub>2</sub> @N/S-C           | 1.0                                      | 1000                | 528                                | 3         |
| FeS@graphene                      | 0.1                                      | 100                 | 838                                | 4         |
| Fe <sub>7</sub> S <sub>8</sub> /C | 1.0                                      | 100                 | 689.4                              | 5         |
| FeS@NSC                           | 1.0                                      | 240                 | 611                                | 6         |
| FeS@PWS900                        | 5.0                                      | 500                 | 1057                               | 7         |
| 3D GCs/FeS                        | 0.5                                      | 160                 | 848                                | 8         |
| FeS/N-doped-C                     | 1.0                                      | 200                 | 621                                | 9         |
| FeS@N-C                           | 1.0                                      | 500                 | 1061                               | 10        |
| Fe <sub>1-x</sub> S@C             | 1.0                                      | 100                 | 952                                | 11        |
| FeS/Fe <sub>3</sub> C             | 0.1                                      | 200                 | 712.2                              | 12        |
| FeS@rGO                           | 5.0                                      | 1000                | 325                                | 13        |
| FeS <sub>2</sub> @rGO             | 5.0                                      | 700                 | 340                                | 14        |
| FeS <sub>2</sub> @C               | 2.0                                      | 1000                | 637                                | 15        |
| FeS@CNS                           | 1.0                                      | 150                 | 701                                | 16        |
| FeS@C-N                           | 0.1                                      | 100                 | 983                                | 17        |
| G@FeS-GNRs                        | 0.4                                      | 100                 | 536                                | 18        |
| FeS@NS-CR                         | 1.0                                      | 500                 | 500                                | 19        |
| MOF-Derived FeS/C                 | 0.1                                      | 500                 | 830                                | 20        |
| FeS/Fe <sub>3</sub> C             | 1.0                                      | 800                 | 610                                | 12        |
| FeS@CMK-5                         | 5.0                                      | 1500                | 1000                               | 21        |
| Fe <sub>1-x</sub> S@C NW          | 0.2                                      | 120                 | 583                                | 22        |
| Fe <sub>1-x</sub> S@C/MCMB        | 0.2                                      | 120                 | 531.7                              | 23        |
| FS/N-HCUF-700S                    | 0.1                                      | 200                 | 632.1                              | 24        |
| Fe <sub>1-x</sub> S@NC            | 5.0                                      | 150                 | 666                                | 25        |
| Fe <sub>1-x</sub> S@rGO           | 0.1                                      | 200                 | 632.1                              | 26        |
| Our work                          | 1.0                                      | 1690                | 939.5                              |           |

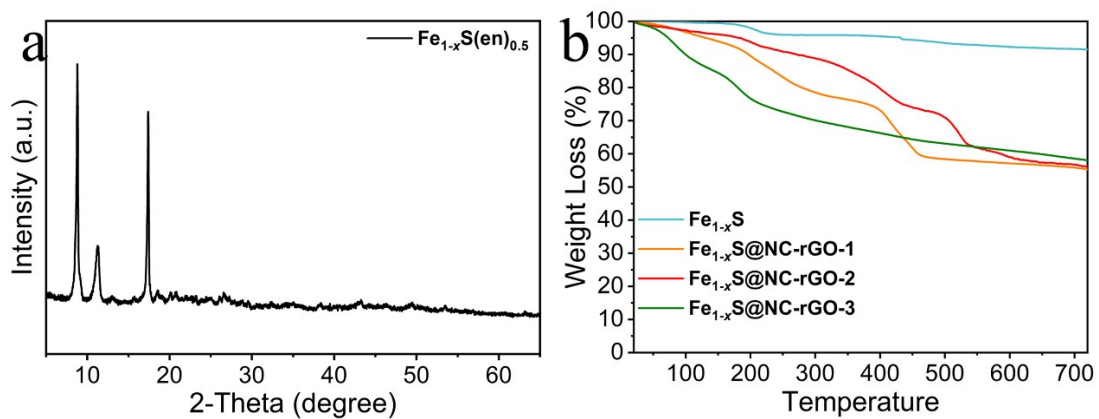

**Fig. S1.** (a) XRD patterns of  $Fe_{1-x}S(en)_{0.5}$ . (b) The thermogravimetric curves of  $Fe_{1-x}S@NC$  and  $Fe_{1-x}S@NC-rGO$ .

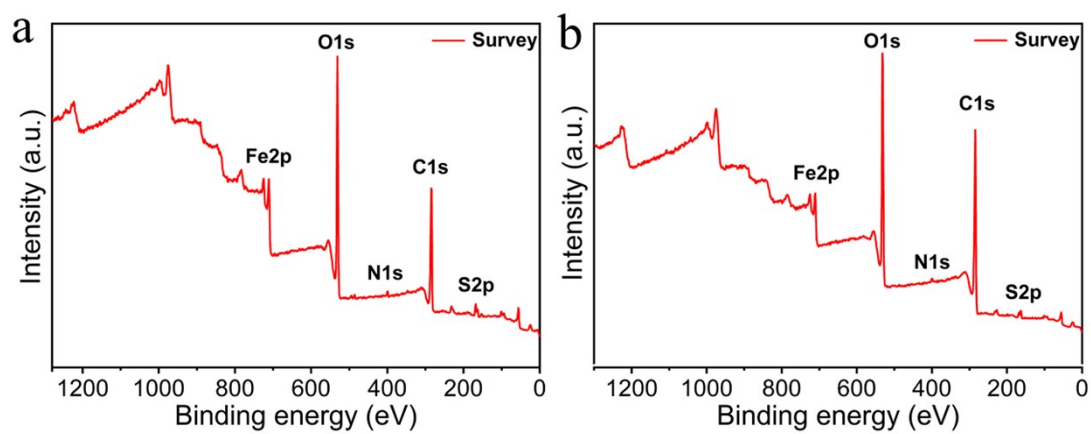

**Fig. S2.** Survey XPS spectra of (a)  $Fe_{1-x}S@NC-1$  and (b)  $Fe_{1-x}S@NC-3$ .

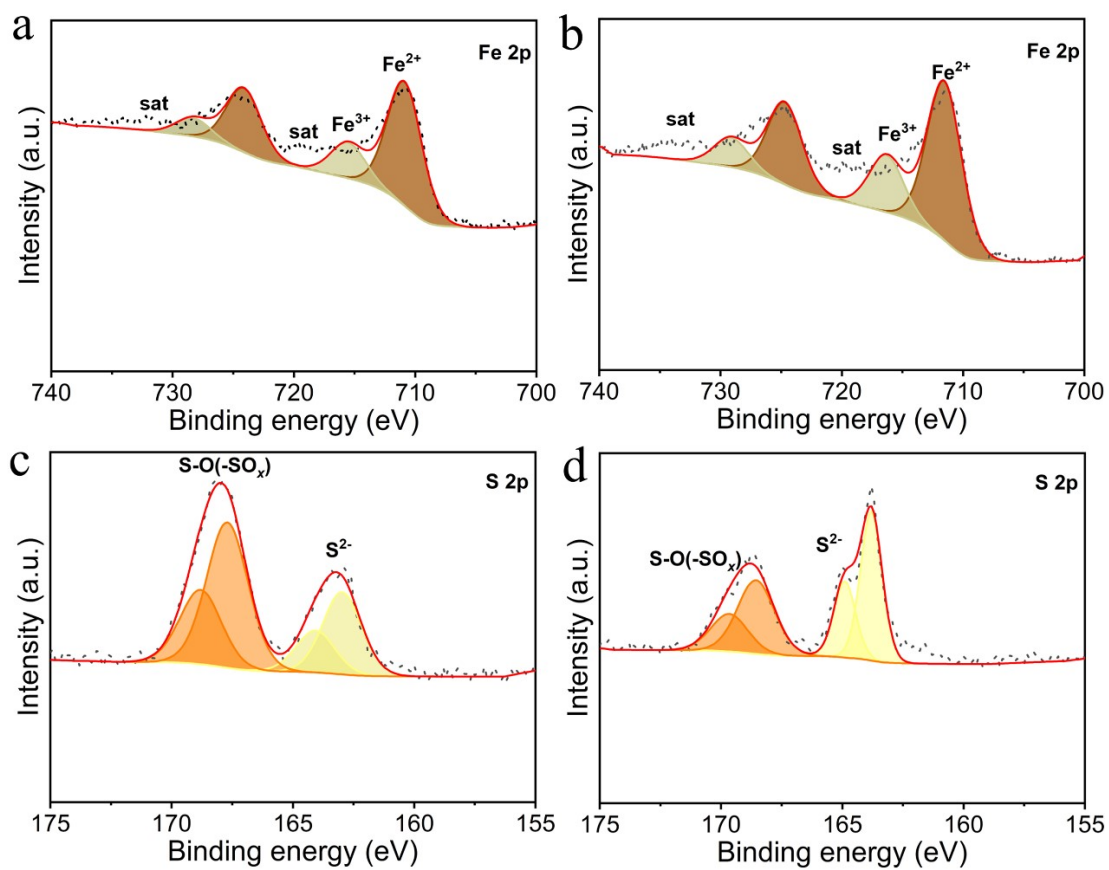

**Fig. S3.** Fe 2p XPS spectra of (a) Fe<sub>1-x</sub>S@NC-1 and (b) Fe<sub>1-x</sub>S@NC-3; (c) S 2p XPS spectra of (d) Fe<sub>1-x</sub>S@NC-1 and Fe<sub>1-x</sub>S@NC-3.

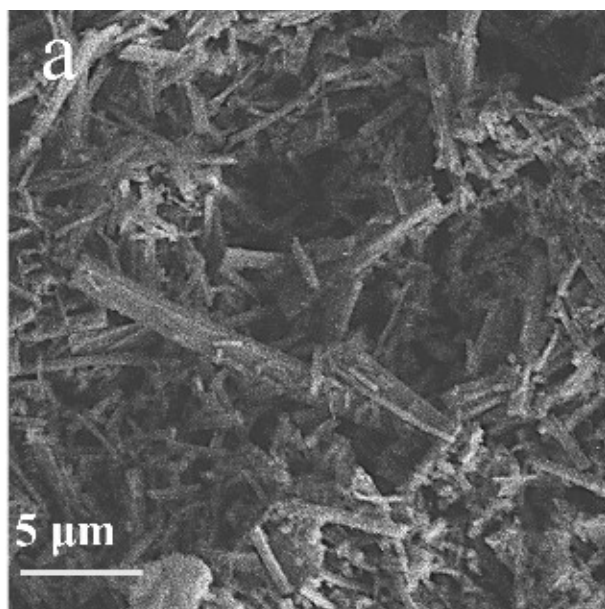

**Fig. S4.** (a) SEM image of Fe<sub>1-x</sub>S(en)<sub>0.5</sub>.

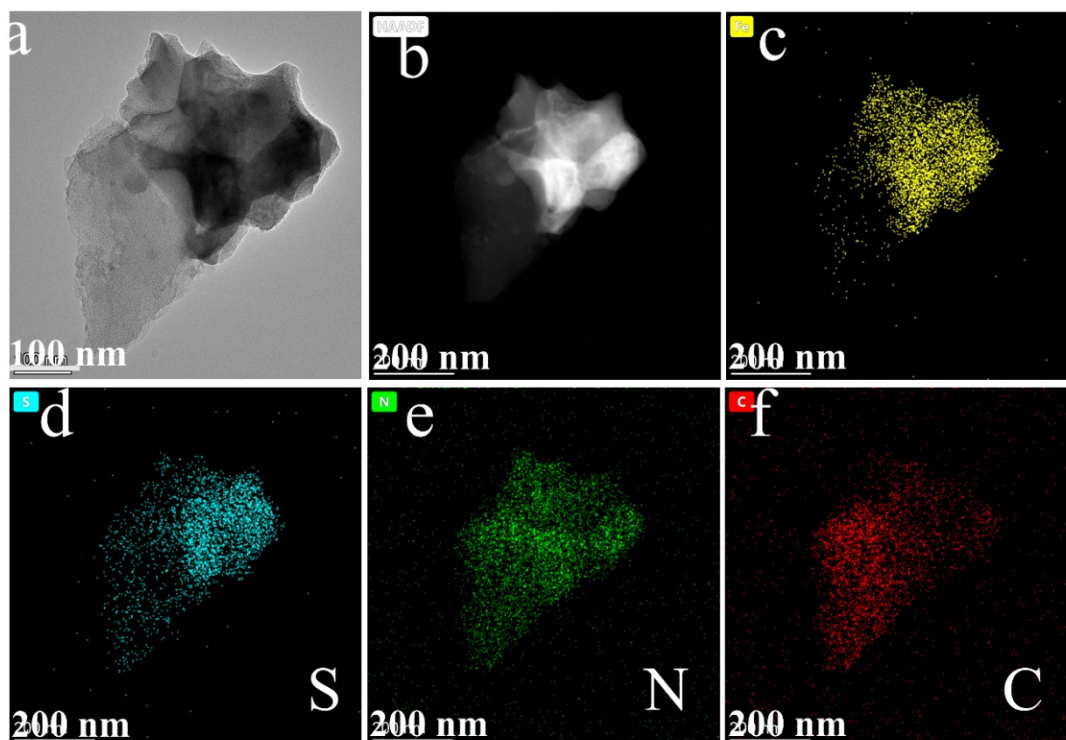

**Fig. S5.** (a) TEM photo of  $\text{Fe}_{1-x}\text{S}@NC$  composite. (b) TEM image and (c-f) the corresponding element distribution maps of  $\text{Fe}_{1-x}\text{S}@NC$  composite: Fe, S, N and C.

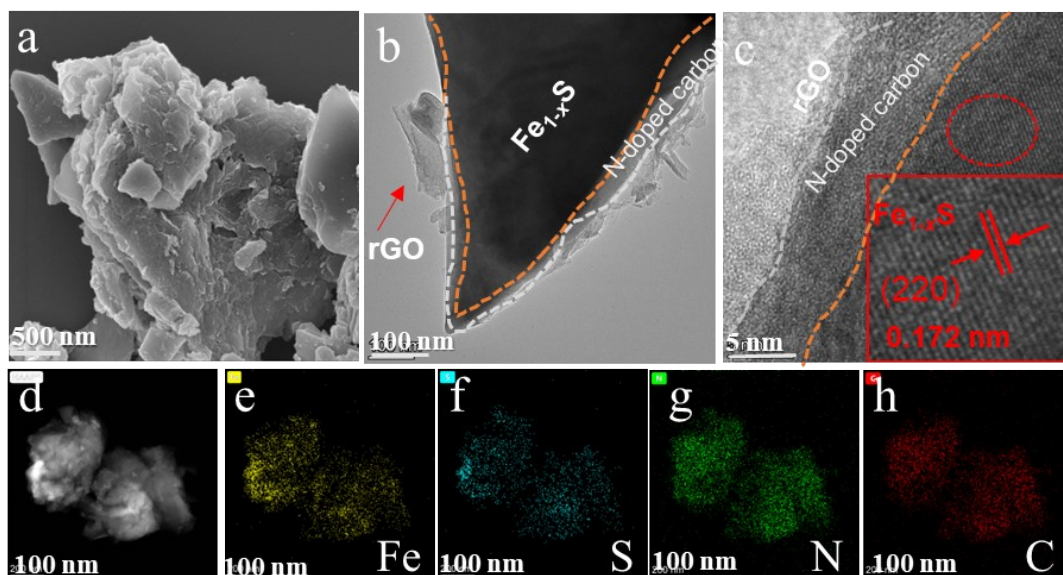

**Fig. S6.** (a) SEM, (b) TEM and (c) HRTEM images of  $\text{Fe}_{1-x}\text{S}@NC\text{-rGO-1}$  composite; (d) TEM image and (e-h) the corresponding element distribution maps of  $\text{Fe}_{1-x}\text{S}@NC\text{-rGO-1}$  composites: Fe, S, N and C.

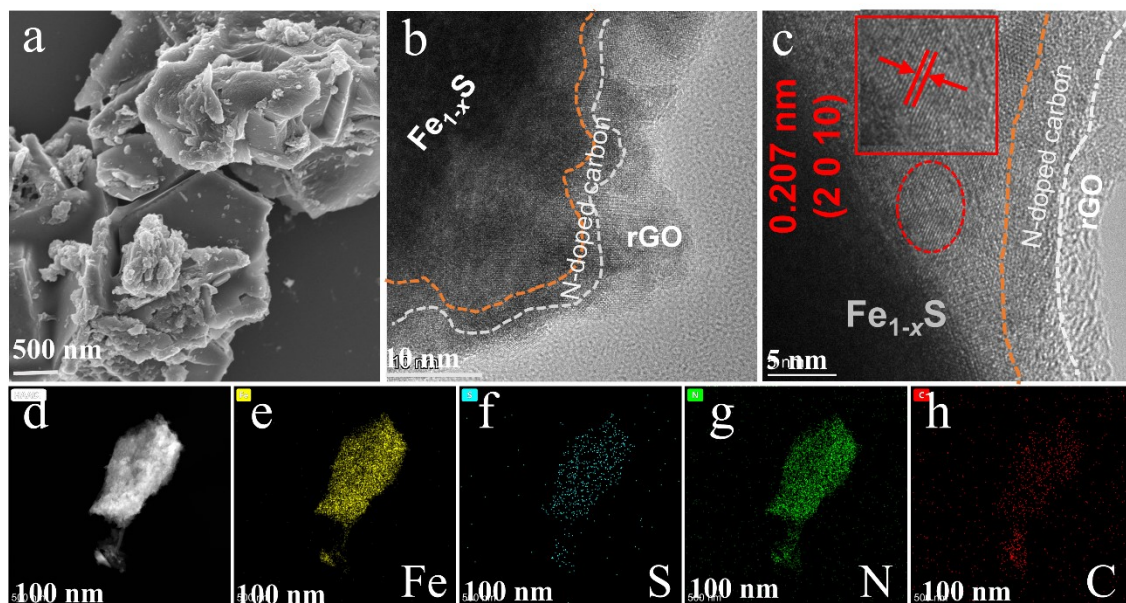

**Fig. S7.** (a) SEM, (b) TEM and (c) HRTEM images of  $\text{Fe}_{1-x}\text{S}@NC\text{-}rGO\text{-}3$  composite; (d) TEM image and (e-h) the corresponding element distribution maps of  $\text{Fe}_{1-x}\text{S}@NC\text{-}rGO\text{-}3$  composites: Fe, S, N and C.



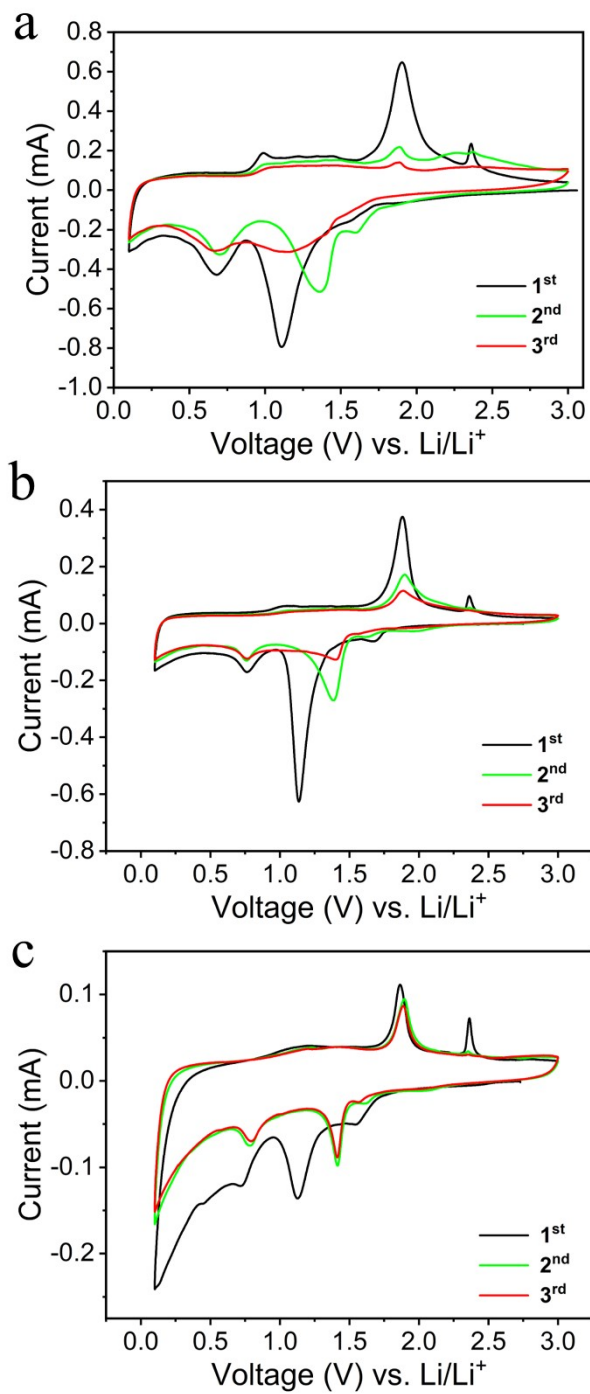

**Fig. S8.** CV curves of (a) Fe<sub>1-x</sub>S@NC, (b) Fe<sub>1-x</sub>S@NC-rGO-1 and (c) Fe<sub>1-x</sub>S@NC-rGO-3 composites.

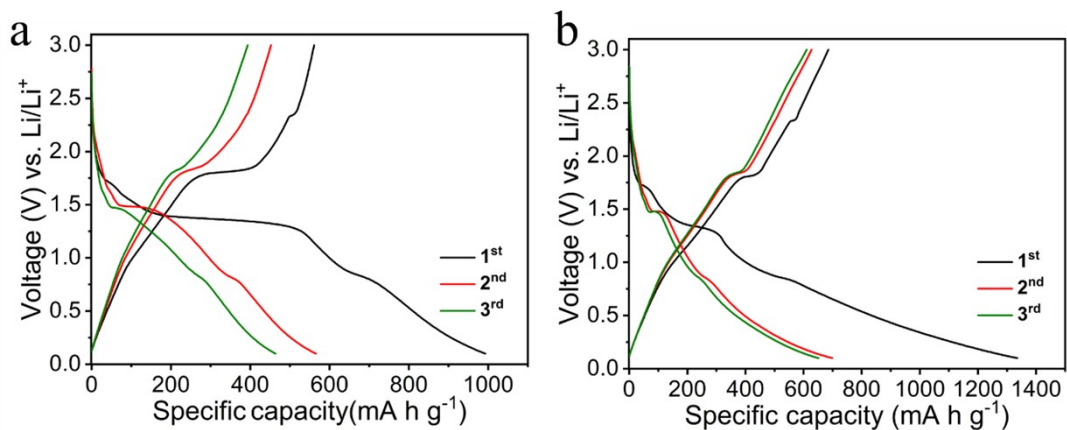

**Fig. S9.** The capacity voltage diagram of (a)  $\text{Fe}_{1-x}\text{S}@NC\text{-rGO-1}$  and (b)  $\text{Fe}_{1-x}\text{S}@NC\text{-rGO-3}$  composites.

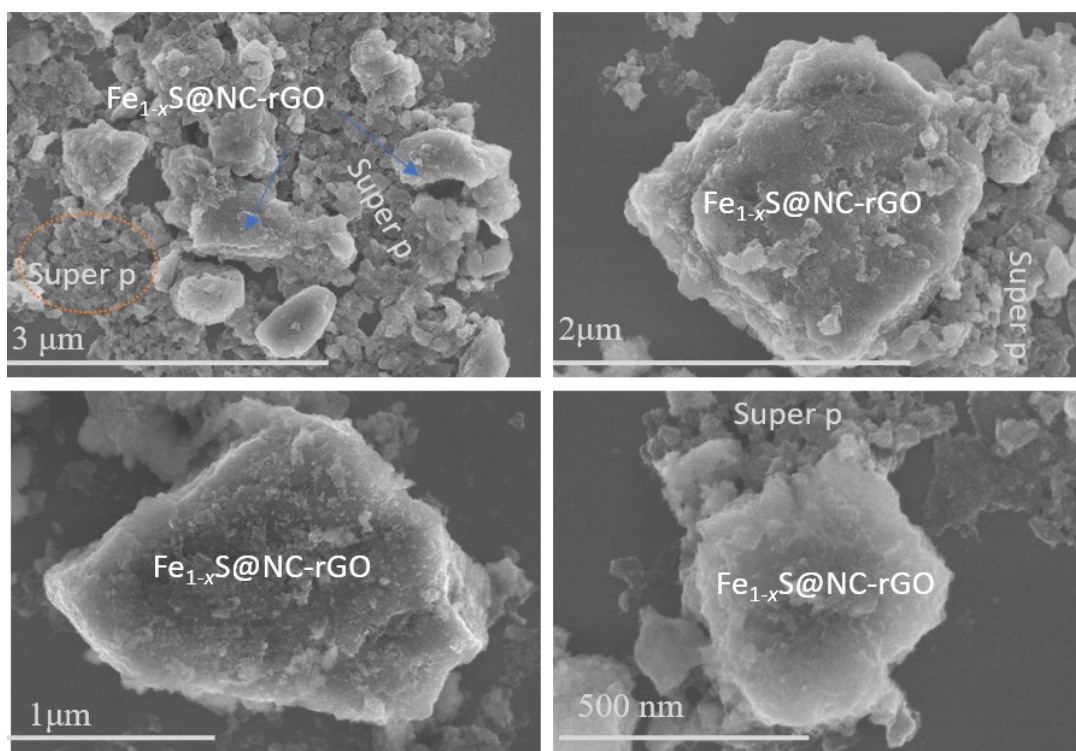

**Fig. S10.** Different magnifications of SEM images for  $\text{Fe}_{1-x}\text{S}@NC\text{-rGO-2}$  electrode after 1700 cycles at  $1 \text{ A g}^{-1}$ .

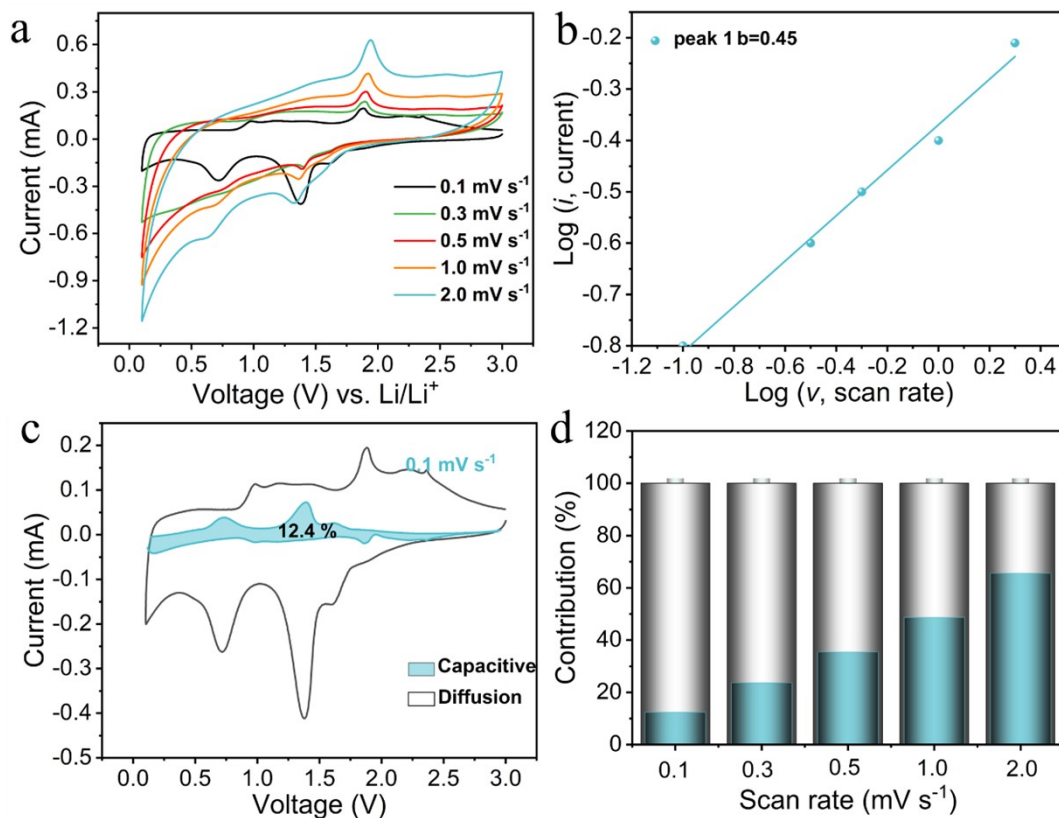

**Fig. S11.** (a) CV curves of  $\text{Fe}_{1-x}\text{S}@NC$  composites at different scan rate range of 0.1 – 2.0  $\text{mV s}^{-1}$ . (b) The relationship between  $\log(i)$  and  $\log(v)$ . (c) Contribution diagrams of capacitance and diffusion control at the scan rate of 2.0  $\text{mV s}^{-1}$ . (d) The contribution ratio of pseudocapacitance behavior of  $\text{Fe}_{1-x}\text{S}@NC$  composites at different scan rates.

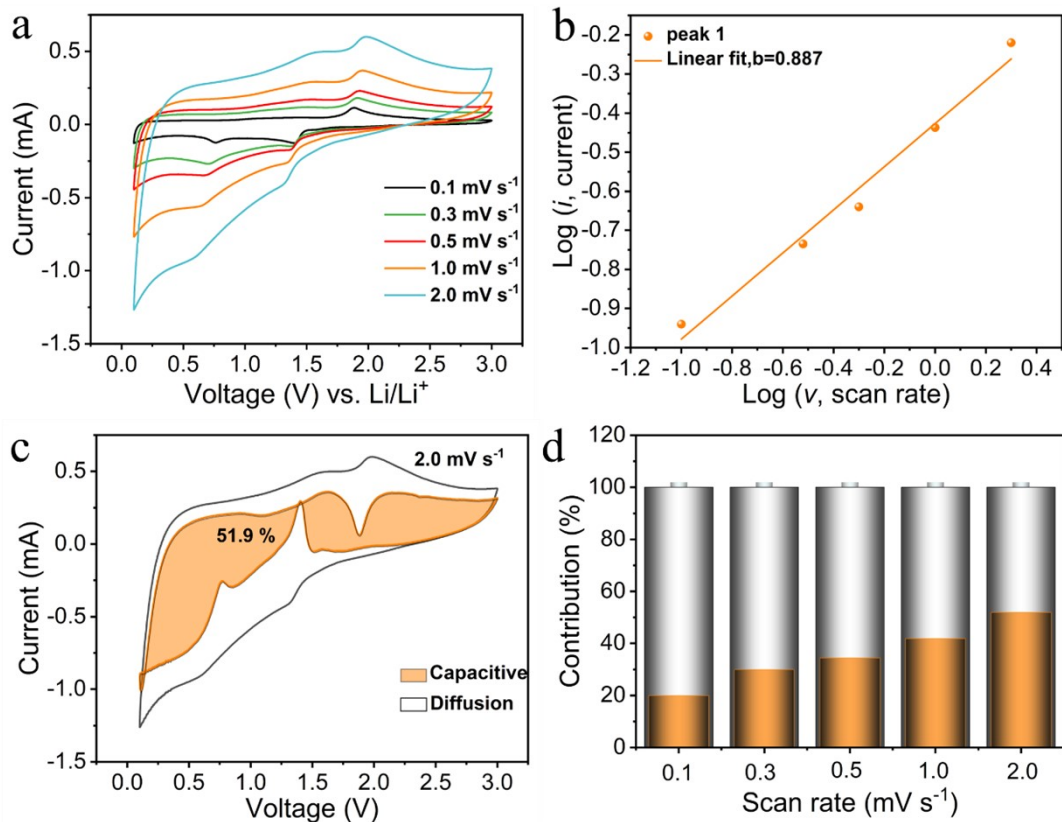

**Fig. S12.** (a) CV curves of  $\text{Fe}_{1-x}\text{S}@NC\text{-rGO-1}$  composites at different scan rate range of 0.1-2.0  $\text{mV s}^{-1}$ . (b) The relationship between  $\log(i)$  and  $\log(v)$ . (c) Contribution diagrams of capacitance and diffusion control at the scan rate of 2.0  $\text{mV s}^{-1}$ . (d) The contribution ratio of pseudocapacitance behavior of  $\text{Fe}_{1-x}\text{S}@NC\text{-rGO-1}$  composites at different scan rates.

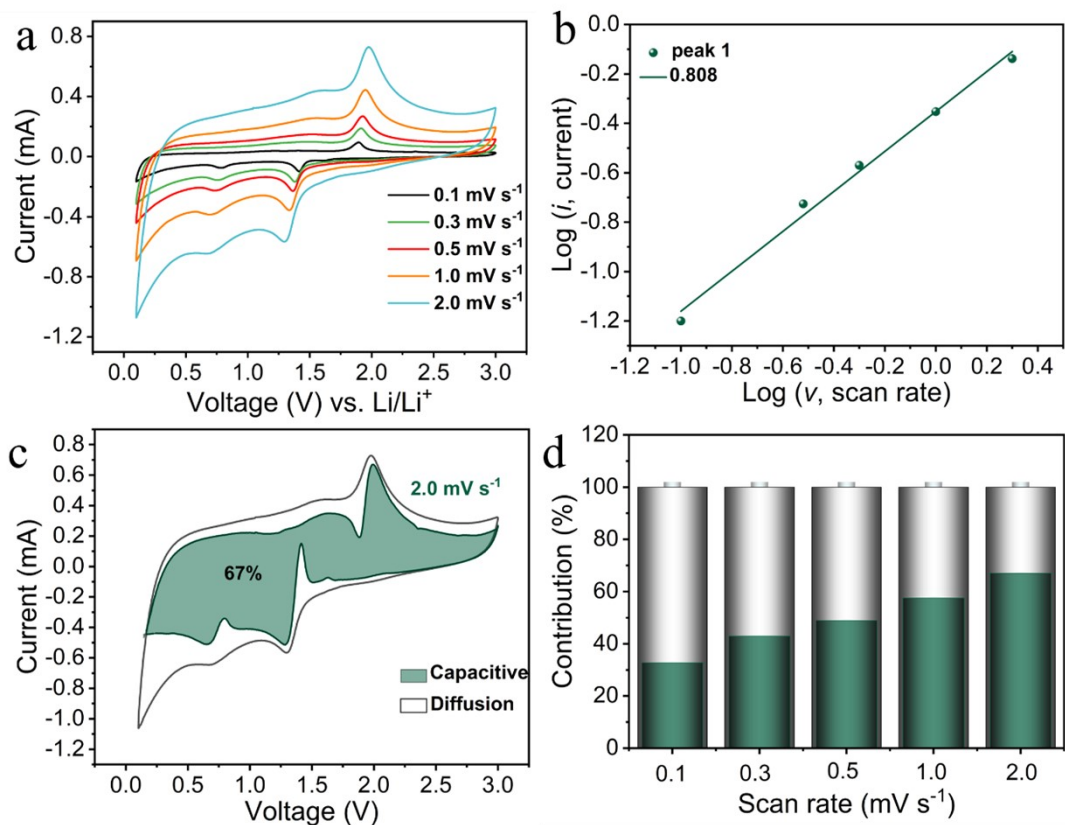

**Fig. S13.** (a) CV curves of Fe<sub>1-x</sub>S@NC-rGO-3 composites at different scan rate range of 0.1-2.0 mV s<sup>-1</sup>. (b) The relationship between log (*i*) and log (*v*). (c) Contribution diagrams of capacitance and diffusion control at scan rate of 2.0 mV s<sup>-1</sup>. (d) The contribution ratio of pseudocapacitance behavior of Fe<sub>1-x</sub>S@NC-rGO-3 composites at different scan rates.

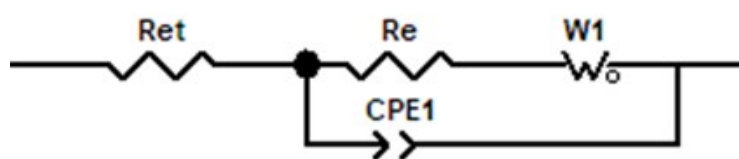

**Fig. S14.** (a) Equivalent circuit used to fit the Nyquist plots.

## References

- 1 J. Yang, T. Mori and M. Kuwabara, *ISIJ. Int.*, 2007, **47**, 1394-1400.
- 2 Y. Zhang, H. Xu, P. Li, P. Han, Y. Huang and M. Liu, *Inorg. Chem. Commun.*, 2022, **137**, 109211.
- 3 Y. Teng, Y. Xu, X. Cheng, S. Gao, X. Zhang, H. Zhao and L. Huo, *J. Alloys. Compd.*, 2022, **909**, 164707.
- 4 D. Ju, X. Cao, H. Li, J. Zheng, C. Chen, Z. Wang, J. Qiu, Y. Zhang, M. Liu and Q. Zhu, *Ceram. Int.*, 2022, **48**, 13508-13515.
- 5 Y.-L. Hou, J. Zhang, T. Qin, R. Zeng, H.-B. Guan, S.-G. Wang and D.-L. Zhao, *Appl. Surf. Sci.*, 2022, **599**, 154042.
- 6 Q. Li, Y. Liu, S. Wei, L. Xu, X. Wu and W. Wu, *J. Electroanal. Chem.*, 2021, **903**, 115848.
- 7 Z. M. Sheng, N. N. Li, Q. M. Xu, C. Y. Hong, S. Y. Wu, C. K. Chang, S. Han and C. M. Li, *Sustain. Energ. Fuels*, 2021, **5**, 4080-4086.
- 8 X. Miao, H. Li, L. Wang, Y. Li, D. Sun, X. Zhou and Z. Lei, *J. Mater. Sci.*, 2020, **55**, 12139-12150.
- 9 J. Xie, J. Carrasco, R. Li, H. Shen, Q. Chen and M. Yang, *J. Power. Sources*, 2019, **431**, 226-231.
- 10 X. Wei, X. Tan, J. Meng, X. Wang, P. Hu, W. Yang, S. Tan, Q. An and L. Mai, *Nano Res.*, 2018, **11**, 6206-6216.
- 11 Q. Ma, H. Song, Q. Zhuang, J. Liu, Z. Zhang, C. Mao, H. Peng, G. Li and K. Chen, *Chem. Eng. J.*, 2018, **338**, 726-733.
- 12 H. Chen, X. Ma and P. K. Shen, *J. Alloys. Compd.*, 2019, **779**, 193-201.
- 13 M. Huang, A. Xu, H. Duan and S. Wu, *J. Mater. Chem. A*, 2018, **6**, 7155-7161.
- 14 Y. Du, S. Wu, M. Huang and X. Tian, *Chem. Eng. J.*, 2017, **326**, 257-264.
- 15 F. Zhang, C. Wang, G. Huang, D. Yin and L. Wang, *J. Power. Sources*, 2016, **328**, 56-64.
- 16 Y. Xu, W. Li, F. Zhang, X. Zhang, W. Zhang, C.-S. Lee and Y. Tang, *J. Mater. Chem. A*, 2016, **4**, 3697-3703.
- 17 Z.-G. Wu, J.-T. Li, Y.-J. Zhong, J. Liu, K. Wang, X.-D. Guo, L. Huang, B.-H. Zhong and S.-G. Sun, *J. Alloys. Compd.*, 2016, **688**, 790-797.
- 18 L. Li, C. Gao, A. Kovalchuk, Z. Peng, G. Ruan, Y. Yang, H. Fei, Q. Zhong, Y. Li and J. M. Tour, *Nano. Res.*, 2016, **9**, 2904-2911.
- 19 A. K. Haridas, H. Kim, C.-H. Choi, H.-J. Ahn and J.-H. Ahn, *Appl. Surf. Sci.*, 2021, **554**, 149587.
- 20 J. Zhao, Z. Hu, D. Sun, H. Jia and X. Liu, *Nanomater.*, 2019, **9**, 492.
- 21 Z. Cao, X. Ma, W. Dong and H. Wang, *J. Alloys. Compd.*, 2019, **786**, 523-529.
- 22 J. Ma, J. Du, J. Lv, H. Jia, M. Zhang, Y. Nie, B. Ren, B. Hai and S. Zhang, *J. Mater. Sci.: Mater. Electron.*, 2021, **32**, 6788-6798.
- 23 J. Lv, J. Du, H. Jia, J. Ma, S. Zheng, Y. Nie, K. Song and L. Bai, *Ceram. Int.*, 2020, **46**, 9485-9491.
- 24 Z. Yan, W. He, X. Zhang, X. Yang, Y. Wang, X. Zhang, Y. Lou and G. Xu, *J. Mater. Sci.: Mater. Electron.*, 2019, **30**, 4527-4540.
- 25 X. Xu, Q. Ma, Z. Zhang, H. Peng, J. Liu, C. Mao and G. Li, *J. Alloys Compd.*, 2019, **797**, 952-960.
- 26 M.-H. Wang, H.-G. Xue and S.-P. Guo, *J. Mater. Res.*, 2019, **34**, 3186-3194.
